# Supplementary material
Source: PubMed Central journal article supplement (PMC4761427)
Supplement: NIHMS759174-supplement-bios.pdf [file NIHMS759174-supplement-bios.pdf]

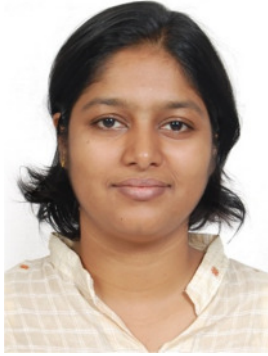

Anju Raja holds a PhD in Bioengineering from the National University of Singapore (NUS) and a Bachelors in Electronics and Instrumentation from Birla Institute of Technology and Science, India. For her doctoral thesis, she worked on developing novel imaging methods to study breast cancer stem cells. She has worked in GE Medical Systems, Institute of Bioengineering and Nanotechnology, A\*STAR, and was involved in establishing a start up company before joining Ngee Ann Polytechnic in 2012. Her areas of interests include biomedical imaging, cancer biology and liver diseases.

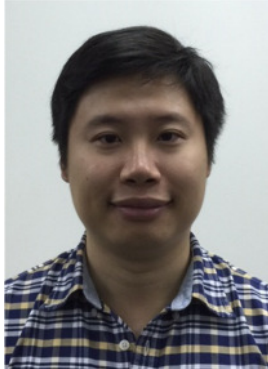

Shuoyu Xu holds a PhD in Computation and System Biology from Singapore-MIT Alliance. He was a research staff in Singapore-MIT Alliance for Research and Technology Center (SMART) and Institute of Bioengineering and Nanotechnology, A\*STAR. He is trained in multidisciplinary areas including computer science, biomedical optics, statistics, and liver biology and pathology. He has extensive experiences for the development of innovative imaging instruments and image analysis software for various pathological and clinical applications.

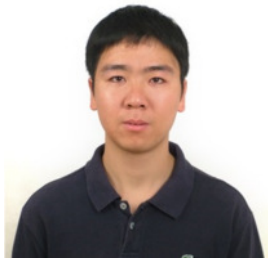

Shuangmu Zhuo received the Ph.D. degree in Optics Engineering from the Fujian Normal University, China, in 2012. He then joined the Singapore-MIT Alliance for Research and Technology as a Postdoctoral Research Fellow. He is currently an Associate Professor in the College of Photonic and Electronic Engineering, Fujian Normal University, China. His research interests include the development and applications of nonlinear optical microscopy in biological and biomedical research.

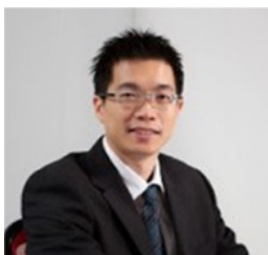

Dean Tai holds a B.Tech (Physics) and a Ph.D. degree from University of Auckland (New Zealand). Dr. Tai was a postdoctoral fellow in the Institute of Bioengineering and Nanotechnology (IBN), A\*STAR. He has 8 years of R&D experience in development and implementation of biomedical imaging equipment in clinics across countries including USA, Australia, New Zealand, and Belgium.

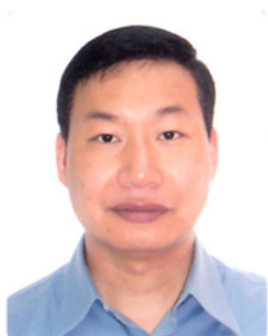

Wanxin Sun received the Ph.D. degree in Physics from National University of Singapore. Dr. Sun was a research scientist in the Institute of Bioengineering and Nanotechnology (IBN), A\*STAR for 3 years. He has years of experiences developing biomedical imaging instruments in academia and industry.

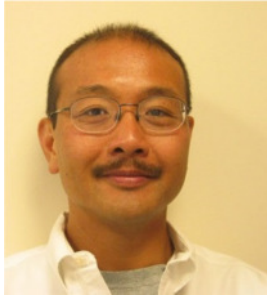

Peter So is a professor in the Department of Mechanical and Biological Engineering in the Massachusetts Institute of Technology. Prior to joining MIT, he obtained his Ph.D. from Princeton University in 1992 and subsequently worked as a postdoctoral associate in the Laboratory for Fluorescence Dynamics in the University of Illinois in Urban-Champaign. His research focuses on developing high resolution and high information content microscopic imaging instruments. Peter So is currently the Director of the MIT Laser Biomedical Research Center, a NIH NIBIB P41 research resource.

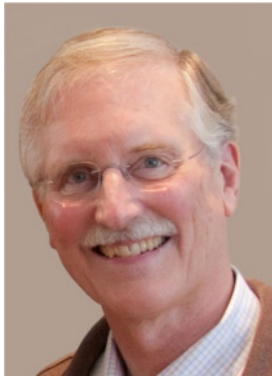

Roy E. Welsch is Eastman Kodak Leaders for Global Operations Professor of Management and Professor of Statistics and Engineering Systems in the Sloan School of Management and the Engineering Systems Division at the Massachusetts Institute of Technology and Director of the M.I.T. Center for Computational Research in Economics and Management Science. He received his A.B. (1965) in Mathematics from Princeton and his M.S. (1966) and Ph.D. (1969) from Stanford also in Mathematics. He is currently involved with research on variable selection in bioinformatics.

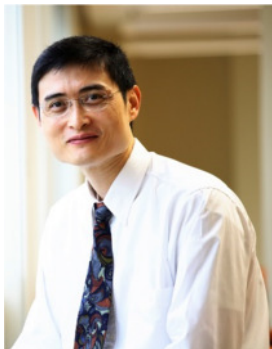

CS Chen, M.D., Ph.D. is currently Professor of Medicine, Pediatrics and Basic Sciences and Chief, Division of Hematology and Oncology, Loma Linda University, USA. Dr. Chen graduated from China Medical University, Taichung, Taiwan and completed Ph.D. and postdoctoral training in molecular oncology disciplines at University of Minnesota. In addition to clinical practice, he actively initiated translational laboratory research during his faculty post at National University of Singapore and current position. His research interest is in experimental therapeutics and stem cell transplantation.

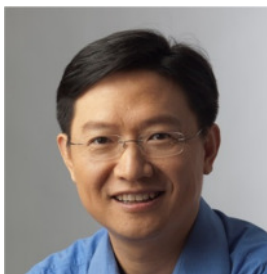

Henry Yu is a professor of physiology at the National University of Singapore and group leader at the Institute of Bioengineering and Nanotechnology, Agency for Science, Technology and Research. He was trained in cell biology at Duke University and Washington University in St Louis, USA, and European Molecular Biology Laboratories. His current research focuses on translating liver cell and tissue biology knowledge into industrial/medical applications through integration of cell sources, cell and tissue models of in vitro drug testing, and image-based analytics.
